# Supplementary material for: Numerical simulation for optimization of ultra-thin n-type AZO and TiO2 based textured p-type c-Si Heterojunction Solar Cells
Source: Research Square preprint supplement (doi:10.21203/rs.3.rs-225454/v1), 2021-02-23
Supplement: Supplementary file 1 [file f04fb7488919a793cdd57e73.docx]

To

The Chief Editor

Silicon

Dear Sir/Madam,

We wish to submit an original research article entitled “Numerical simulation for optimization of ultra-thin n-type AZO and TiO2 based textured p-type c-Si Heterojunction Solar Cells” by Chandan et al. for your kind consideration for publication in Silicon.

We confirm that this work is original and has not been published elsewhere, nor is it currently under consideration for publication elsewhere. Further, we have no conflicts of interest to disclose.

The paper describes the optimization of layers parameter used for Aluminium doped zinc oxide based silicon heterojunction solar cells and Titanium dioxide based silicon heterojunction solar cells using AFORS-HET simulation software. An efficiency of 17.5% is reported in this work, without the use of any intrinsic layer. Process of removal of intrinsic layer would be cost effective at industrial scale and also resolves environmental & safety related issues. Also, the role of texturing at different angle is discussed to optimize best efficiency for the modelled device. Texturing at different angle is reported in very few articles and much more work needs to be performed in this area. This article is related to optimization of different properties of layers used in our work for modelling silicon heterojunction solar cells.

We believe that this manuscript is appropriate for publication by Silicon.

Thank you for your consideration of this manuscript.

Sincerely yours,

Sushil Kumar
